# Supplementary material
Source: publisher site journal article supplement (https://www.spandidos-publications.com/4525/downloadSupplementary)

Figure S1. Comparison of the levels of inflammatory cytokines. Comparison of (A) TNF- $\alpha$ , (B) IL-1 $\beta$ , (C) IL-6 and (D) IL-17 among HCs, patients with S-COPD and patients with AE-COPD. CDC42, cell division cycle 42; COPD, chronic obstructive pulmonary disease; S-COPD, stable COPD; AE-COPD, acute exacerbation COPD; HCs, health controls. \* $P < 0.05$  AE-COPD vs. HCs, # $P < 0.05$  AE-COPD vs. S-COPD,  $^{\$}P < 0.05$  S-COPD vs. HCs.

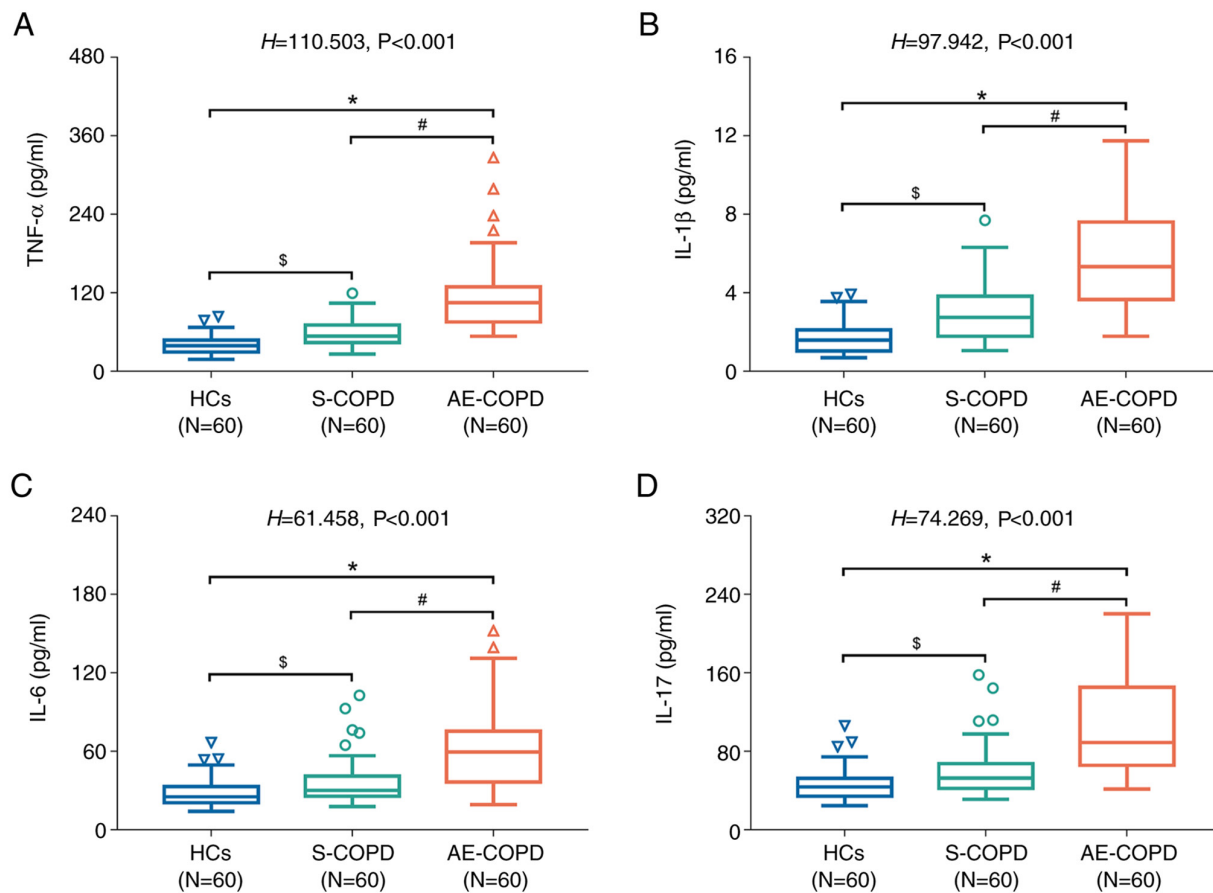

Figure S2. Correlation between CDC42 expression and the levels of inflammatory cytokines. Correlation of CDC42 expression with (A) TNF- $\alpha$ , (B) IL-1 $\beta$ , (C) IL-6 and (D) IL-17 in patients with stable COPD. Correlation between CDC42 expression and the levels of (E) TNF- $\alpha$ , (F) IL-1 $\beta$ , (G) IL-6 and (H) IL-17 in HCs. CDC42, cell division cycle 42; COPD, chronic obstructive pulmonary disease S-COPD, stable COPD; HCs, health controls.

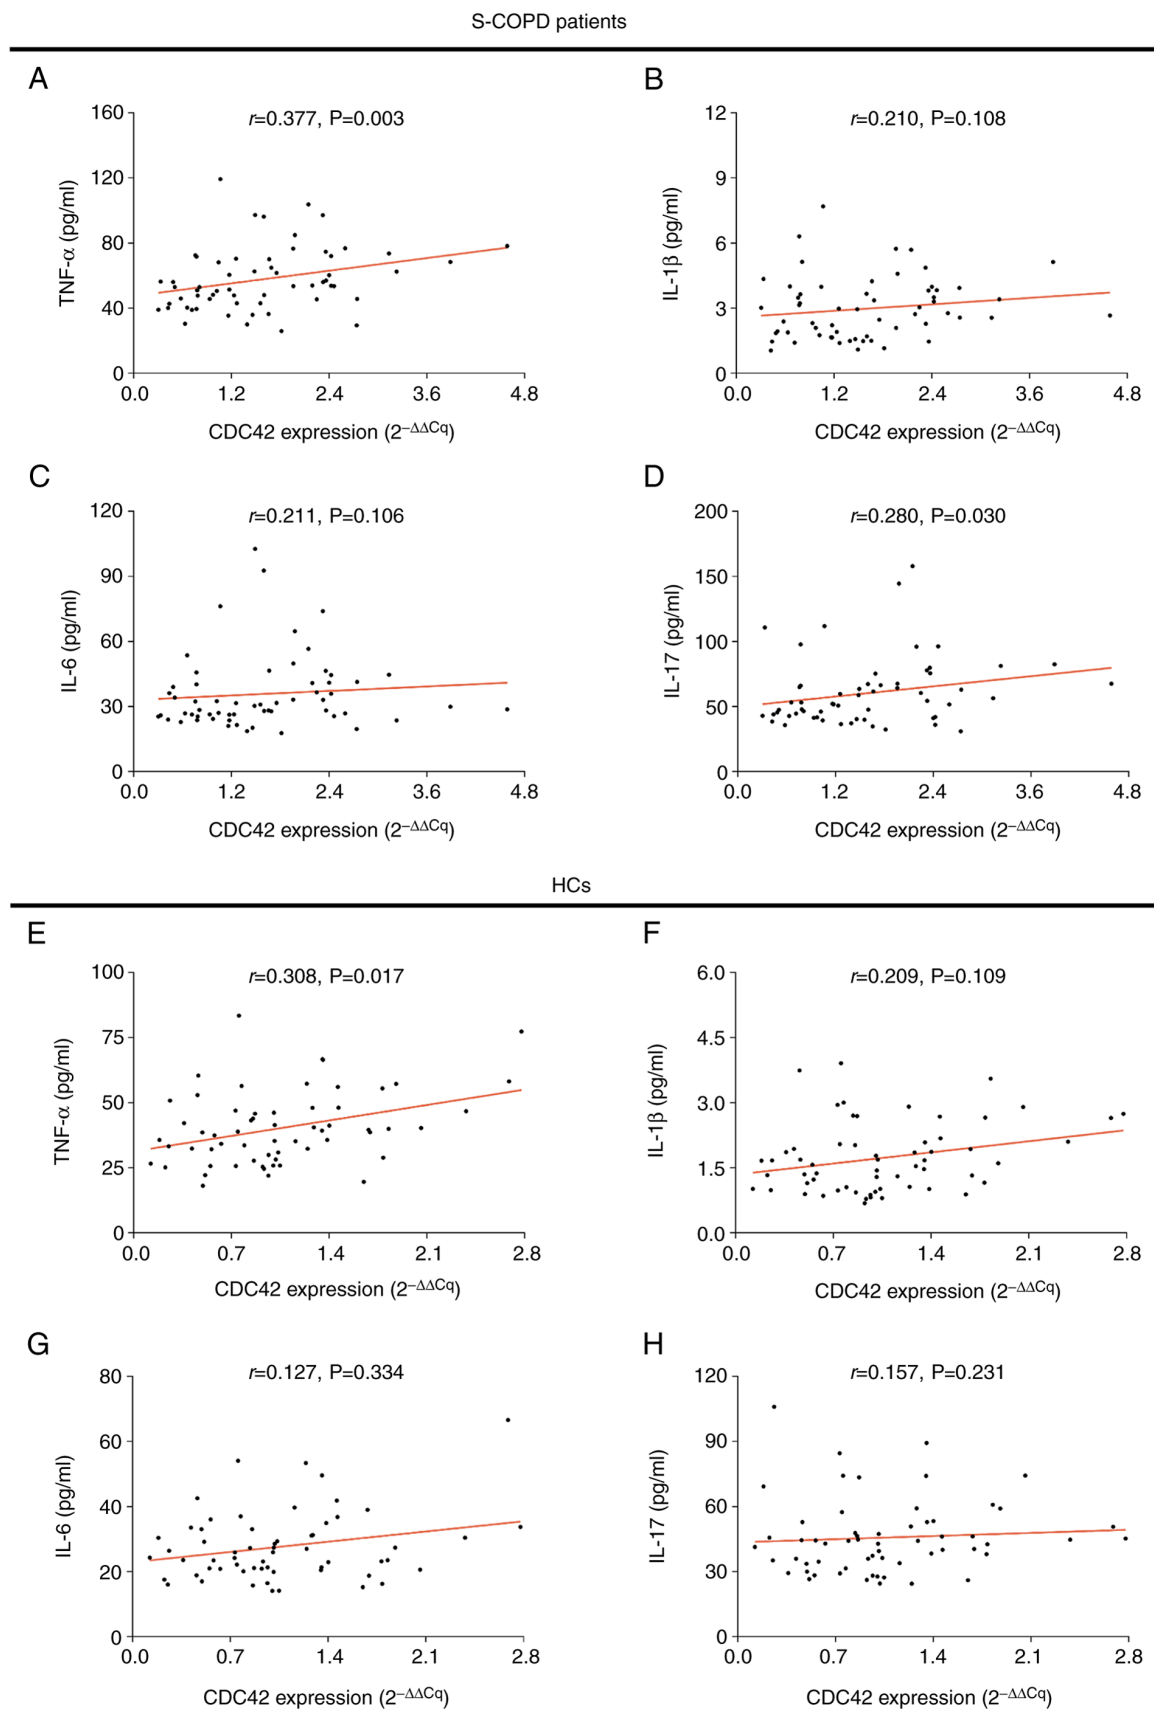

Supplement: Supplementary file 1 [file downloadSupplementary]
